# Supplementary material
Source: PubMed Central journal article supplement (PMC3604688)
Supplement: NIHMS49053-supplement-01.pdf [file NIHMS49053-supplement-01.pdf]

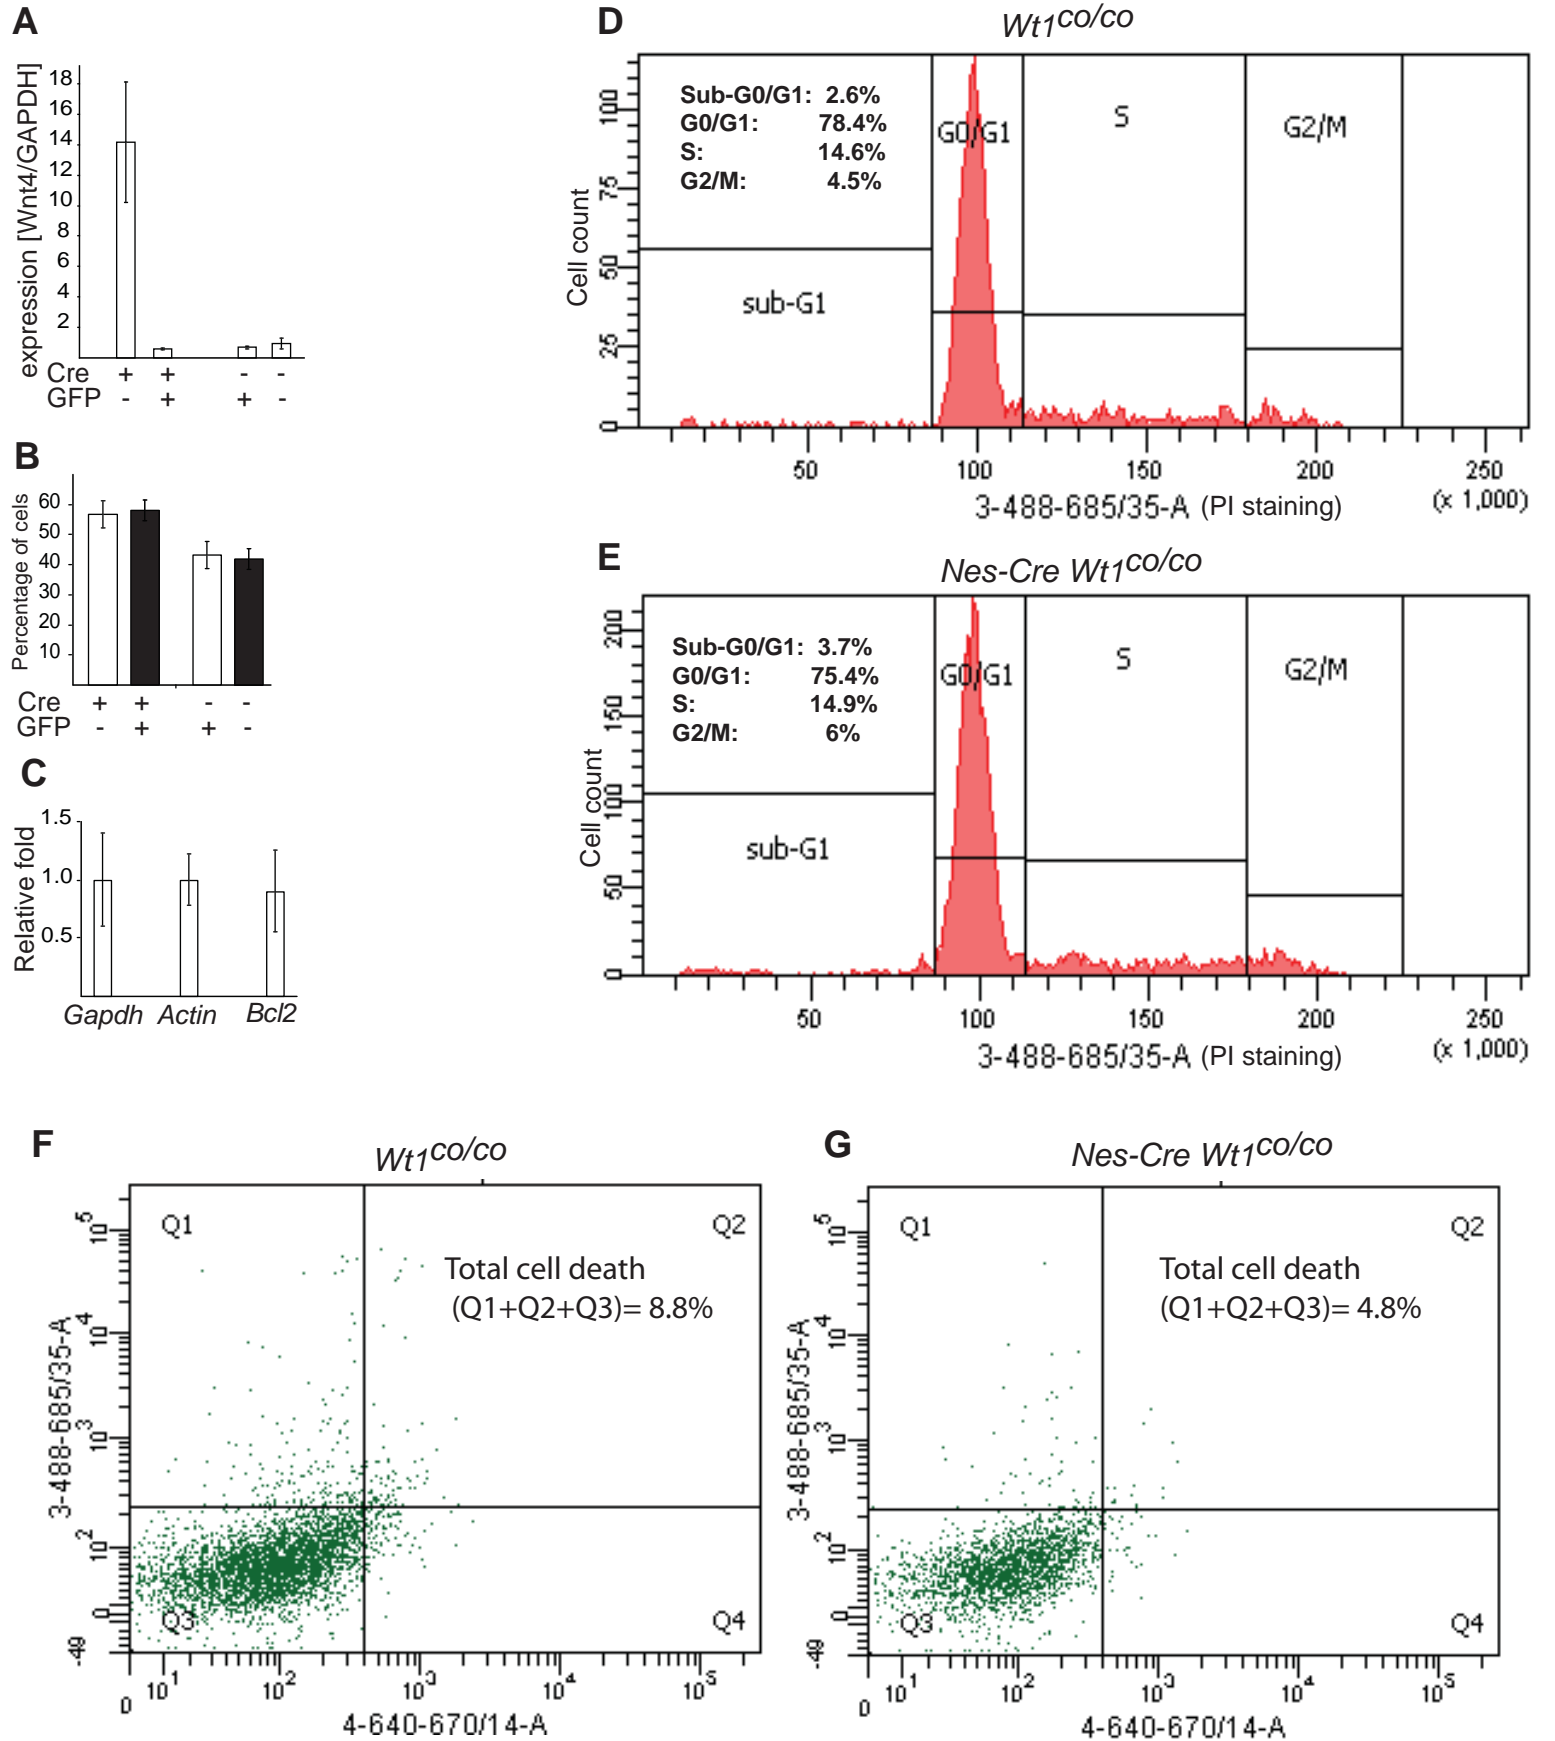

## Figure S1

### Apoptosis phenotype of the *Nes-Cre* mutant e12.5 kidneys.

All experiments in this figure are undertaken in GFP-sorted cells from e12.5 embryonic kidneys.

**A**- RT-qPCR: The levels of *Wnt4* in FACS-sorted cells from kidneys from *Nes-Cre Wt1<sup>co/GFP</sup>* and *Wt1<sup>co/GFP</sup>* e12.5 embryos. The results are an average from cells isolated from at least 4 embryos in each case.

**B**- Percentage of FACS-sorted cells from embryonic kidneys from *Nes-Cre Wt1<sup>co/GFP</sup>* and *Wt1<sup>co/GFP</sup>* e12.5 embryos.

**C**- RT-qPCR: The levels of the indicated genes in embryonic kidneys from *Nes-Cre Wt1<sup>co/GFP</sup>* is divided by the levels of the same genes in *Wt1<sup>co/GFP</sup>* e12.5 embryos.

**F & G**- FACS analysis of AnnexinV (staining of GFP positive cells isolated from e12.5 kidneys from control (F) and mutant (G)). The percentage of total cell death (i.e. apoptotic and necrotic cells) is indicated below each panel.

Figure S1 supports and corroborates the data presented in Figures 1A-F

A

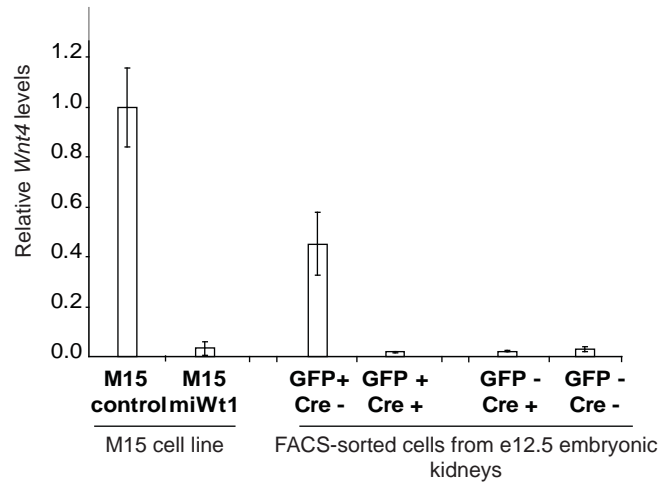

B

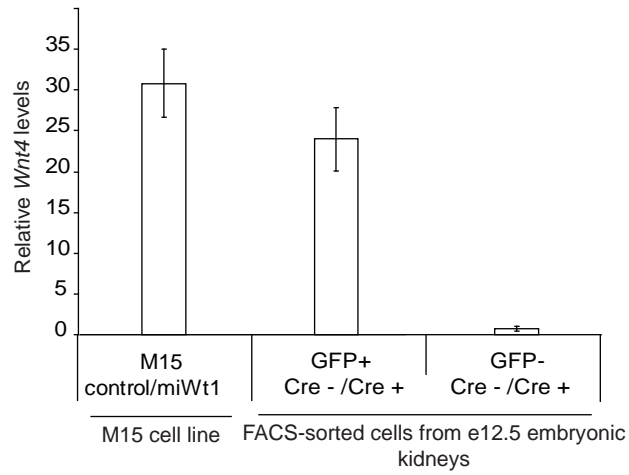

**Figure S2**

**The absolute *Wnt4* expression levels in the e12.5 kidney mesenchyme primary cells and the M15 cell line.**

**A-** The absolute levels of *Wnt4* are compared between M15 control, miWt1, GFP+ and GFP- cells e12.5 kidney cells. GFP+ and GFP- cells either had Cre added (Cre+ and hence *Wt1* is knocked out) or not (Cre- and hence *Wt1* is still expressed). GFP is knocked in the *Wt1* gene.

**B-** The fold of *Wnt4* repression in cells where *Wt1* is silenced (M15) or knocked out (e12.5 embryonic kidneys). All data are from at least a biological triplicate. Figure S2 supports and corroborates the data presented in Figure 2.

A

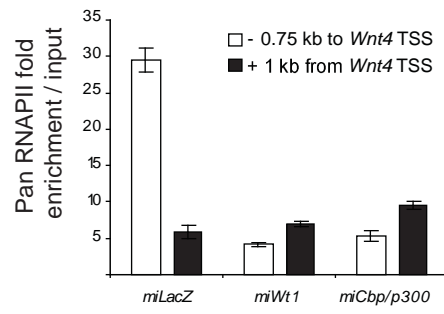

B

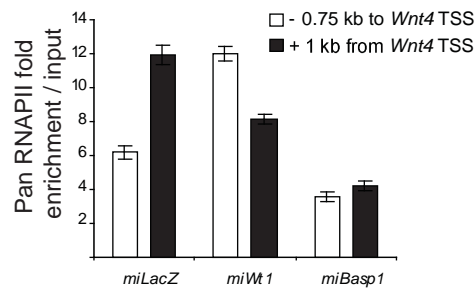

**Figure S3**  
**RNA polymerase II (RNAPII) occupancy upstream and downstream of the *Wnt4* TSS**

**A-** RNAPII occupancy upstream and downstream of *Wnt4* TSS in the kidney mesenchymal cell line, M15.  
**B-** RNAPII occupancy upstream and downstream of *Wnt4* TSS in the epicardial cell line, MEEC.  
Figure S3 supports and corroborates data in Figure 5.
